# Supplementary material for: Resveratrol as Inducer of Autophagy, Pro-Survival, and Anti-Inflammatory Stimuli in Cultured Human RPE Cells
Source: MDPI journal article supplement (doi:10.3390/ijms21030813), 2020-01-27
Supplement: s1 [file s1]

Supplementary Table S1. List of analytes on the protein array.

| Coordinate | Analyte/Control             | Alternate Nomenclature            |
|------------|-----------------------------|-----------------------------------|
| A1,A2      | Reference Spots             | RS                                |
| A3,A4      | Adiponectin                 | Acrp30                            |
| A5,A6      | Aggrecan                    | Aggrecan 1                        |
| A7,A8      | Angiogenin                  |                                   |
| A9,A10     | Angiopoietin-1              | Ang-1, ANGPT1                     |
| A11,A12    | Angiopoietin-2              | Ang-2, ANGPT2                     |
| A13,A14    | BAFF                        | BLyS, TNFSF13B                    |
| A15,A16    | BDNF                        | Brain-derived Neurotrophic Factor |
| A17,A18    | Complement Component C5/C5a | C5/C5a                            |
| A19,A20    | CD14                        | TNFRSF8                           |
| A21, A22   | CD30                        |                                   |
| A23,A24    | Reference Spots             | RS                                |
| B3, B4     | CD40 ligand                 | CD40L, TNFSF5, CD154, TRAP        |
| B5, B6     | Chitinase 3-like 1          | CHI3L1, YKL-40                    |
| B7, B8     | Complement Factor D         | Adipsin, CFD                      |
| B9, B10    | C-Reactive Protein          | CRP, Factor                       |
| B11, B12   | Cripto-1                    | Teratocarcinoma-derived Growth    |
| B13, B14   | Cystatin C                  | CST3, ARMD11                      |
| B15, B16   | Dkk-1                       | Dickkopf-1                        |
| B17, B18   | DPPIV                       | CD26, DPP4, Dipeptidyl-peptidase  |
| B19, B20   | EGF                         | Epidermal Growth Factor           |
| B21, B22   | EMMPRIN                     | CD147, Basigin IV,                |
| C3, C4     | ENA-78                      | CXCL5                             |
| C5, C6     | Endoglin                    | CD105, ENG                        |
| C7, C8     | Fas Ligand                  | TNFSF6, CD178, CD95L              |
| C9, C10    | FGF basic                   | FGF-2                             |
| C11, C12   | FGF-7                       | KGF                               |
| C13, C14   | FGF-19                      |                                   |
| C15, C16   | Flt-3 Ligand                | FLT3LG                            |
| C17, C18   | G-CSF                       | CSF3                              |
| C19, C20   | GDF-15                      | MIC-1                             |
| C21, C22   | GM-CSF                      | CSF2                              |
| D1, D2     | GRO- $\alpha$               | CXCL1, MSGA- $\alpha$             |
| D3, D4     | Growth Hormone              | GH, Somatotropin                  |
| D5, D6     | HGF                         | Scatter Factor, SF                |
| D7, D8     | ICAM-1                      | CD54                              |
| D9, D10    | IFN- $\gamma$               | IFNG                              |
| D11, D12   | IGFBP-2                     |                                   |
| D13, D14   | IGFBP-3                     |                                   |
| D15, D16   | IL-1 $\alpha$               | IL-1F1                            |
| D17, D18   | IL-1 $\beta$                | IL-1F2                            |
| D19, D20   | IL-1ra                      | IL-1F3                            |
| D21, D22   | IL-2                        |                                   |
| D23, D24   | IL-3                        |                                   |

|          |                               |                                |
|----------|-------------------------------|--------------------------------|
| E1, E2   | IL-4                          |                                |
| E3, E4   | IL-5                          |                                |
| E5, E6   | IL-6                          |                                |
| E7, E8   | IL-8                          | CXCL8                          |
| E9, E10  | IL-10                         |                                |
| E11, E12 | IL-11                         |                                |
| E13, E14 | IL-12, p70                    |                                |
| E15, E16 | IL-13                         |                                |
| E17, E18 | IL-15                         |                                |
| E19, E20 | IL-16                         |                                |
| E21, E22 | IL-17A                        | IL-17, CTLA8                   |
| E23, E24 | IL-18 Bpa                     |                                |
| F1, F2   | IL-19                         |                                |
| F3, F4   | IL-22                         | IL-TIF                         |
| F5, F6   | IL-23                         | IL-23A, SGRF                   |
| F7, F8   | IL-24                         | C49A, FISP, MDA-7, MOB-5, ST16 |
| F9, F10  | IL-27                         |                                |
| F11, F12 | IL-31                         |                                |
| F13, F14 | IL-32 $\alpha/\beta/\gamma$   |                                |
| F15, F16 | IL-33                         | C9orf26, DVS27, NF-HEV         |
| F17, F18 | IL-34                         | C16orf77                       |
| F19, F20 | IP-10                         | CXCL10                         |
| F21, F22 | I-TAC                         | CXCL11, SCYB9B                 |
| F23, F24 | Kallikrein 3                  | PSA, KLK3                      |
| G1, G2   | Leptin                        | OB                             |
| G3, G4   | LIF                           |                                |
| G5, G6   | Lipocalin-2                   | NGAL, LCN2, Siderocalin        |
| G7, G8   | MCP-1                         | CCL2, MCAF                     |
| G9, G10  | MCP-3                         | CCL7, MARC                     |
| G11, 12  | M-CSF                         | CSF1                           |
| G13, 14  | MIF                           |                                |
| G15, 16  | MIG                           | CXCL9                          |
| G17, 18  | MIP-1 $\alpha$ /MIP-1 $\beta$ | CCL3/CCL4                      |
| G19, 20  | MIP-3 $\alpha$                | CCL20, Exodus-1, LARC          |
| G21, 22  | MIP-3 $\beta$                 | CCL19, ELC                     |
| G23, G24 | MMP-9                         | CLG4B, Gelatinase B            |
| H1, H2   | Myeloperoxidase               | MPO, Lactoperoxidase           |
| H3, H4   | Osteopontin                   | OPN                            |
| H5, H6   | PDGF-AA                       |                                |
| H7, H8   | PDGF-AB/BB                    |                                |
| H9, H10  | Pentraxin-3                   | PTX3, TSG-14                   |
| H11, H12 | PF4                           | CXCL4                          |
| H13, H14 | RAGE                          |                                |
| H15, H16 | RANTES                        | CCL5                           |
| H17, H18 | RBP4                          |                                |
| H19, H20 | Relaxin-2                     | RLN2, RLXH2                    |
| H21, H22 | Resistin                      | ADSF, FIZZ3, RETN              |
| H23, H24 | SDF-1 $\alpha$                | CXCL12, PBSF                   |

|          |                   |                        |
|----------|-------------------|------------------------|
| I1, I2   | Serpin E1         | PAI-I, PAI-1, Nexin    |
| I3,I4    | SHBG              | ABP                    |
| I5, I6   | ST2               | IL-1, R4, IL1RL1, ST2L |
| I7, I8   | TARC              | CCL17                  |
| I9, I10  | TFF3              | ITF, TFI               |
| I11, I12 | TfR               | CD71, TFR1, TFRC, TRFR |
| I13, I14 | TGF- $\alpha$     | TGFA                   |
| I15, I16 | Thrombospondin-1  | THBS1, TSP-1           |
| I17, I18 | TNF-alpha         | TNFSF1A                |
| I19, I20 | uPAR              | PLAUR                  |
| I21, I22 | VEGF              | BEGFA                  |
| J1, J2   | Reference Spots   | RS                     |
| J5, J6   | Vitamin D BP      | VDB, DBP, VDBP         |
| J23, J24 | Negative Controls | Control (-)            |
